# Supplementary material
Source: PubMed Central journal article supplement (PMC2733211)
Supplement: NIHMS100559-supplement-1_si_001.pdf [file NIHMS100559-supplement-1_si_001.pdf]

## Supplemental Data

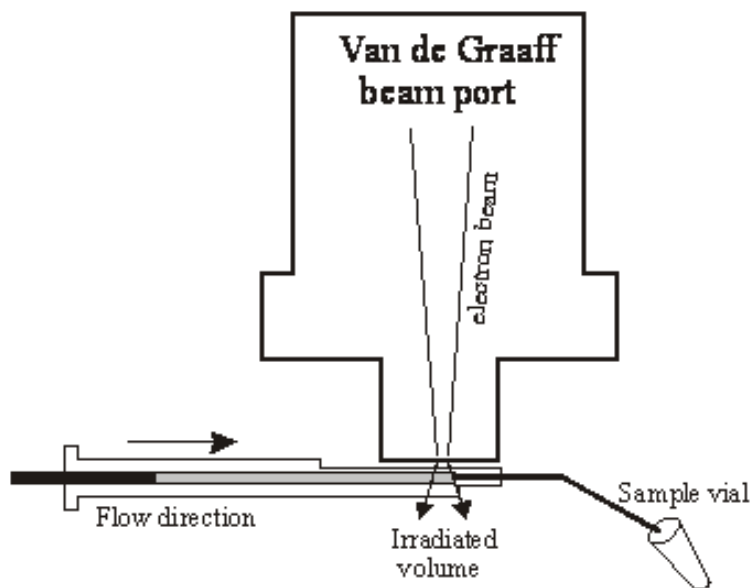

**Figure S1.** Schematic representation of the electron pulse protein oxidation setup.

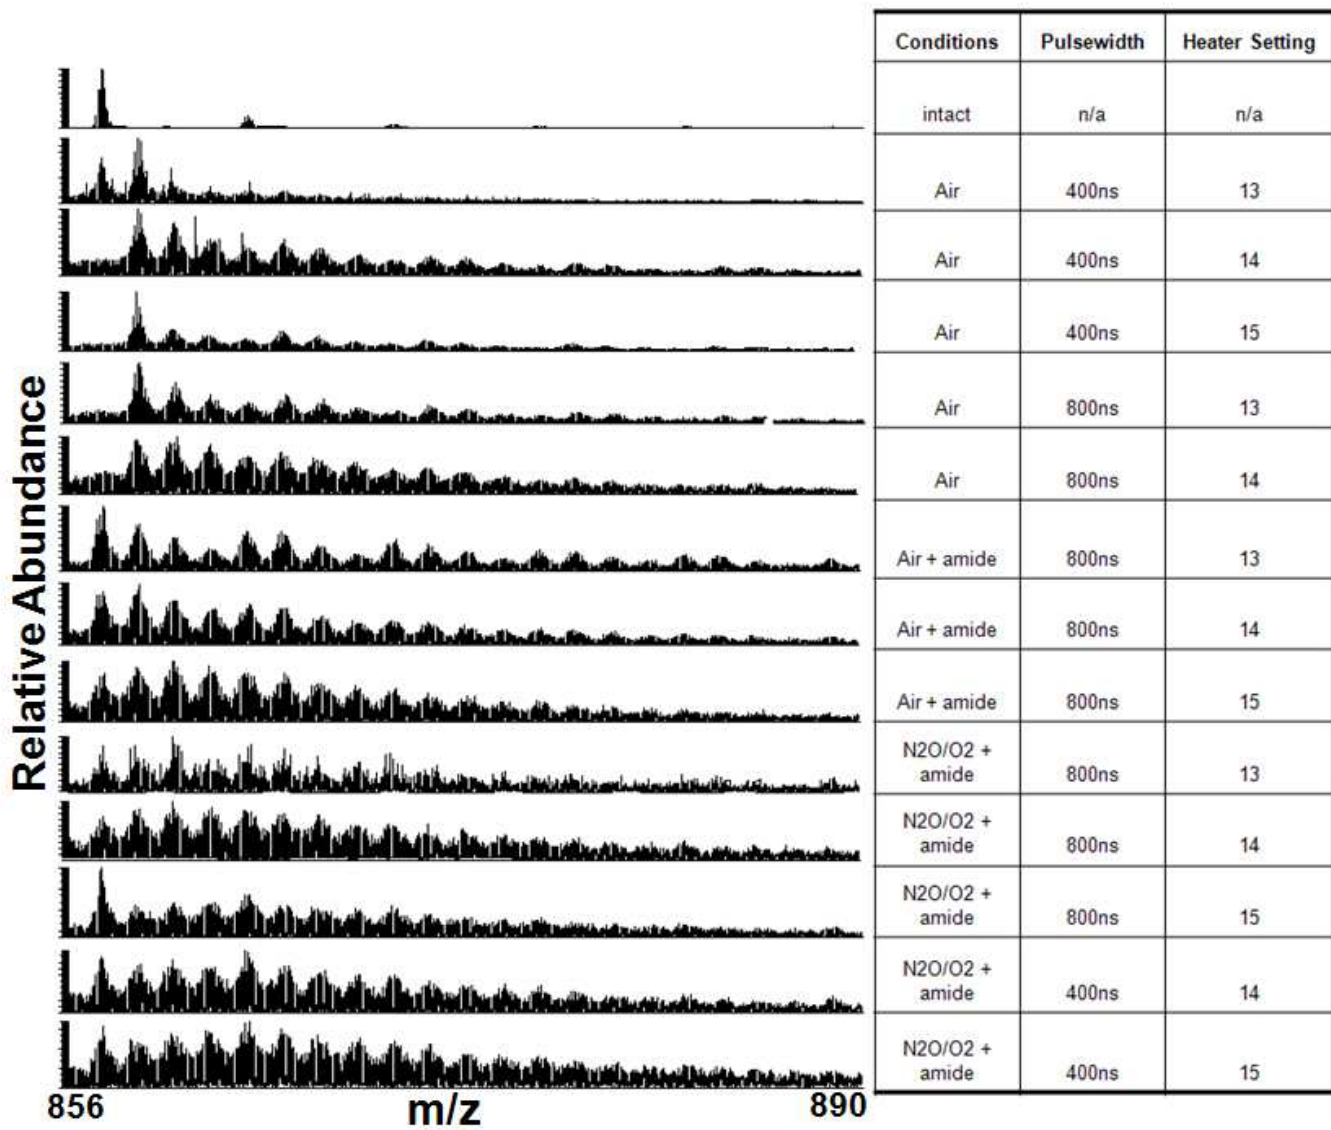

**Figure S2.** LC-MS of the 10+ charge state of intact ubiquitin. Phosphate adducts were seen from sodium phosphate buffer. The conditions of irradiation are listed to the right of each spectra.

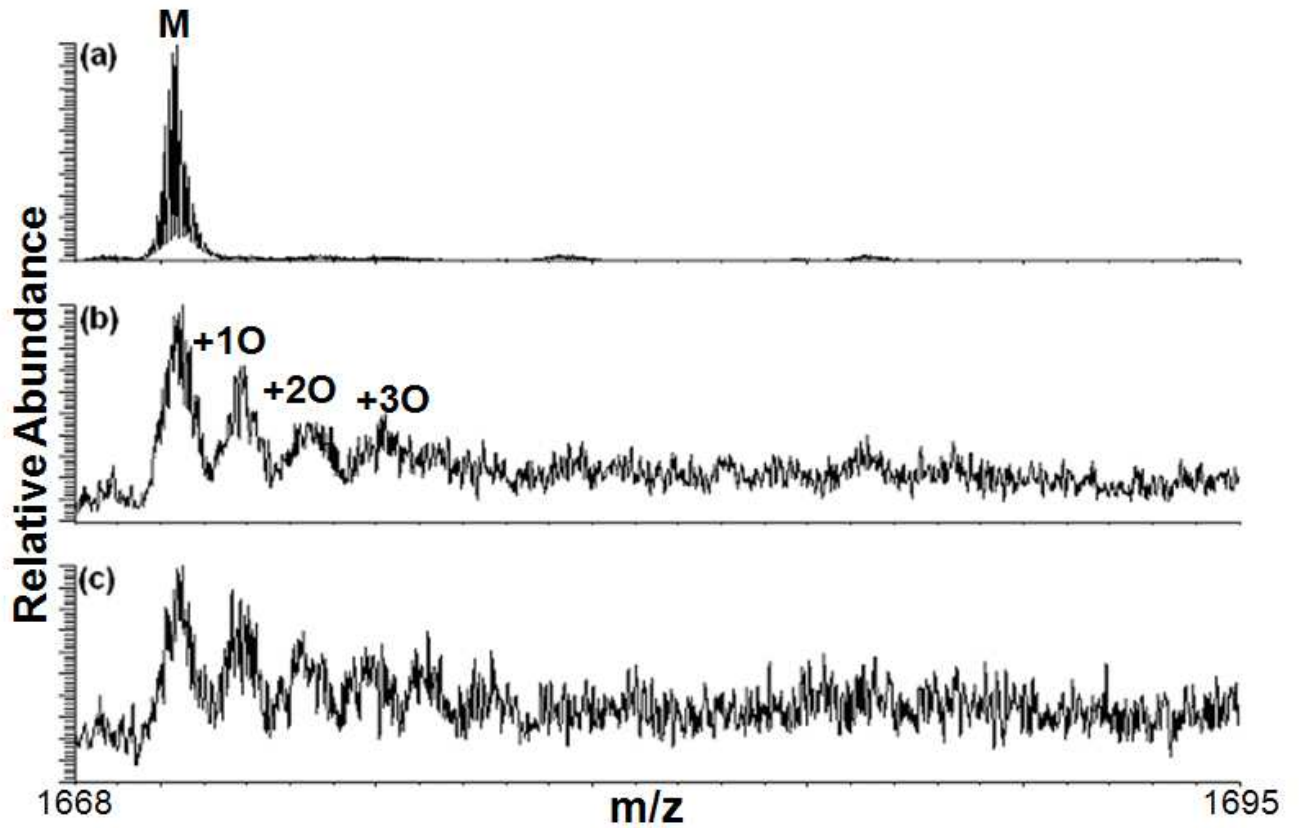

**Figure S3.** LC-MS of the 13+ charge state of intact  $\beta$ -Lactoglobulin. (a) Unirradiated ammonium phosphate buffered  $\beta$ -Lactoglobulin.  $\beta$ -Lactoglobulin was irradiated for 200 ns (b) and 400 ns (c) in air + methionine amide.

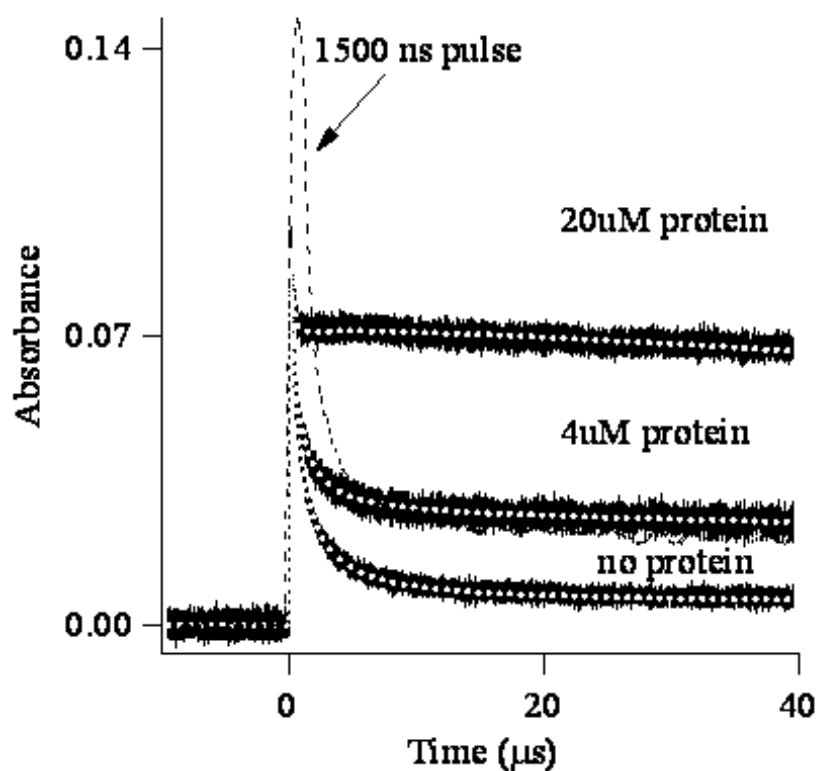

**Figure S4.** Transient absorption signals monitored after the pulse of electrons at 250nm. Solid lines-signals recorded after 400ns pulse; dashed line-signal recorded after 1500ns pulse; white dotted line-represents global fit of the transient absorption signals. All solutions were fixed at pH=7 with ammonium phosphate buffer and contained 25mM  $N_2O$ , the concentration of  $\beta$ -lactoglobulin was varied like indicated on the figure.

**Table S1. Reactions and Parameters Used in the Transient Absorption Global****Fitting**

| <b>Reaction</b>                                                                                      | <b>Product extinction coefficient<br/>[M<sup>-1</sup> cm<sup>-1</sup>]</b> | <b>Rate constant<br/>[M<sup>-1</sup> dm<sup>-3</sup>]</b> |
|------------------------------------------------------------------------------------------------------|----------------------------------------------------------------------------|-----------------------------------------------------------|
| OH + OH → H <sub>2</sub> O <sub>2</sub>                                                              | 26                                                                         | 5.0×10 <sup>9</sup>                                       |
| OH + H <sub>2</sub> O <sub>2</sub> → O <sub>2</sub> <sup>-</sup> + H <sub>2</sub> O + H <sup>+</sup> | 1890                                                                       | 3.7×10 <sup>7</sup>                                       |
| OH + H → H <sub>2</sub> O                                                                            | non absorbing                                                              | 7.0×10 <sup>9</sup>                                       |
| H + H → H <sub>2</sub>                                                                               | non absorbing                                                              | 5.0×10 <sup>9</sup>                                       |
| OH + PO <sub>4</sub> <sup>3-</sup> → products                                                        | non absorbing                                                              | 1.0×10 <sup>5</sup>                                       |
| OH + protein → protein radical                                                                       | 691                                                                        | 1.24×10 <sup>10</sup>                                     |
| H + protein → protein radical                                                                        | 691                                                                        | 8.7×10 <sup>8</sup>                                       |
| protein radical → products                                                                           | non absorbing                                                              | 2.9×10 <sup>3</sup>                                       |

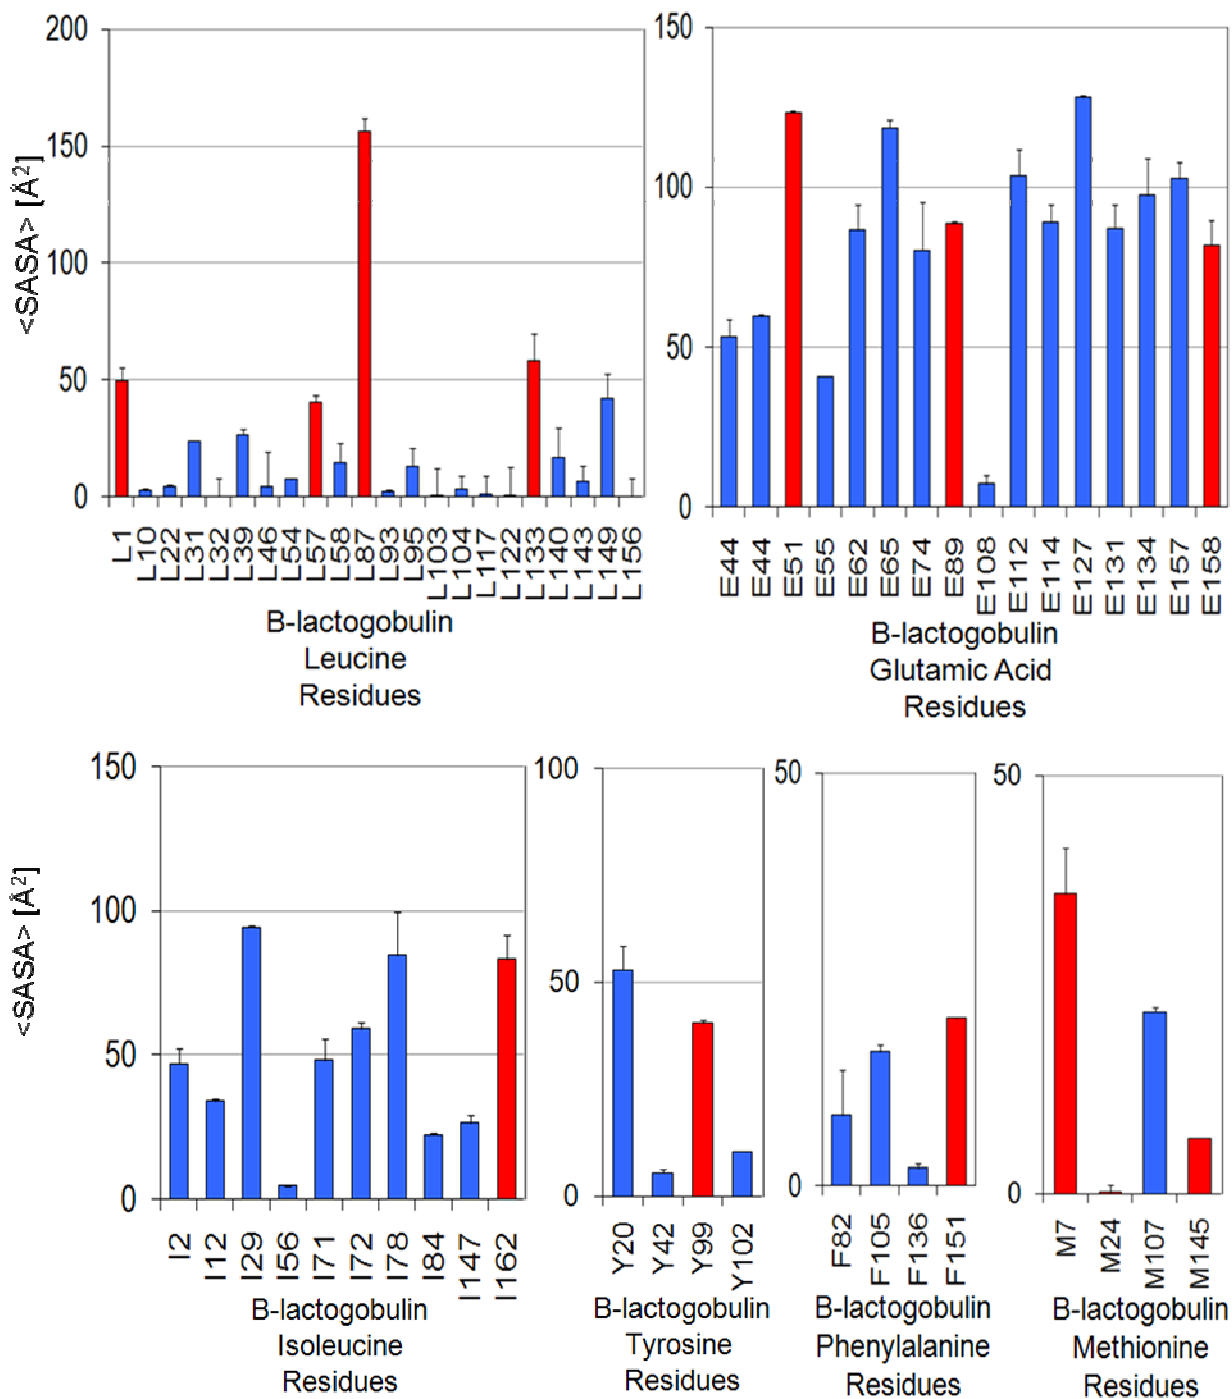

**Figure S5.** Surface average solvent accessibility (<SASA>) value for the amino acid groups of β-lactoglobulin that contained at least one oxidized residue. The oxidized residues are colored red.
